# Supplementary material for: The 1,3,5-Triazine Derivatives as Innovative Chemical Family of 5-HT6 Serotonin Receptor Agents with Therapeutic Perspectives for Cognitive Impairment
Source: PubMed Central journal article supplement (PMC6678253; doi:10.3390/ijms20143420), 2019-07-12
Supplement: ijms-20-03420-s001.pdf [file ijms-20-03420-s001.pdf]

## Supplementary material

# The 1,3,5-triazine derivatives as innovative chemical family of 5-HT<sub>6</sub> serotonin receptor agents with therapeutic perspectives for cognitive impairment

Gniewomir Latacz, Annamaria Lubelska, Magdalena Jastrzębska-Więsek, Anna Partyka, Małgorzata Anna Marć, Grzegorz Satała, Daria Wilczyńska, Magdalena Kotańska, Małgorzata Więcek, Katarzyna Kamińska, Anna Wesołowska, Katarzyna Kieć-Kononowicz, Jadwiga Handzlik

### Table of contents:

1. MS spectra and MS ion fragment analyses of compound **1** and its metabolites 1
2. MS spectra and MS ion fragment analyses of compound **2** and its metabolites 3
3. MS spectra and MS ion fragment analyses of compound **3** and its metabolites 4
4. MS spectra and MS ion fragment analyses of compound **4** and its metabolites 6
5. UPLC spectra of the reference reaction with HLMs.....8

### 1. MS spectra and MS ion fragment analyses of compound **1** and its metabolites.

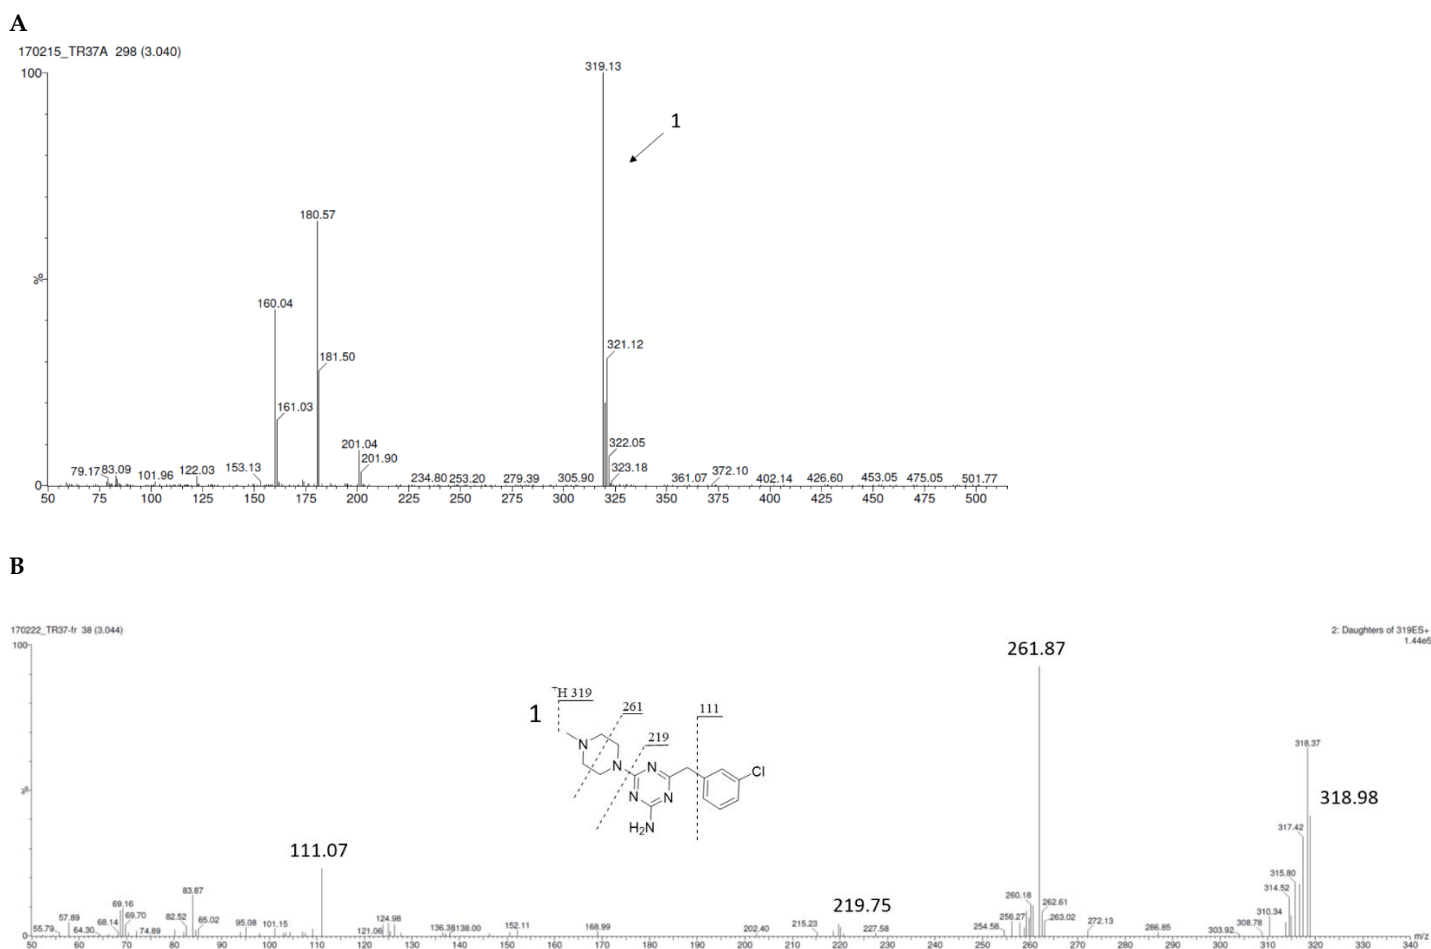

Figure S1. MS spectrum of compound **1** (A) and its MS ion fragment analysis (B).

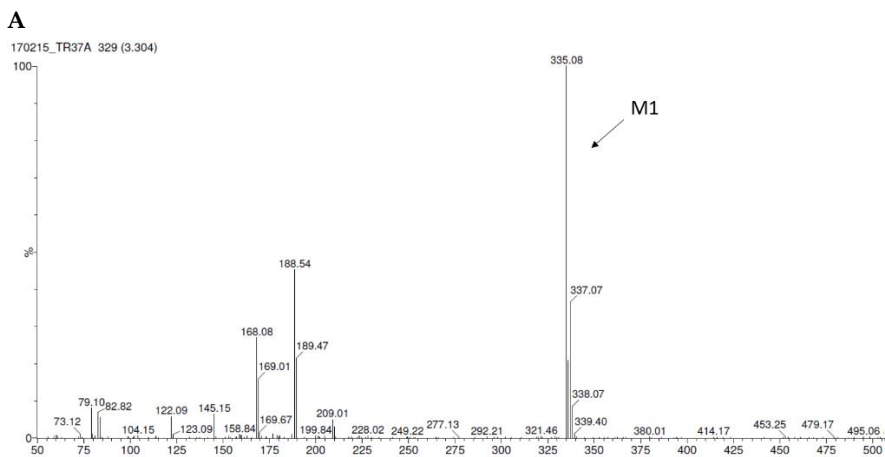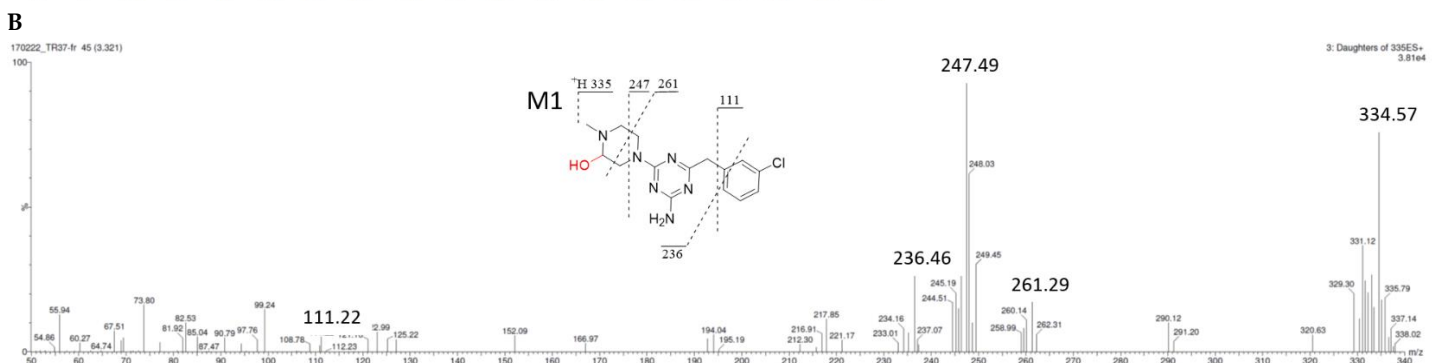

Figure S2. MS spectrum of compound's 1 metabolite M1 (A) and its MS ion fragment analysis (B).

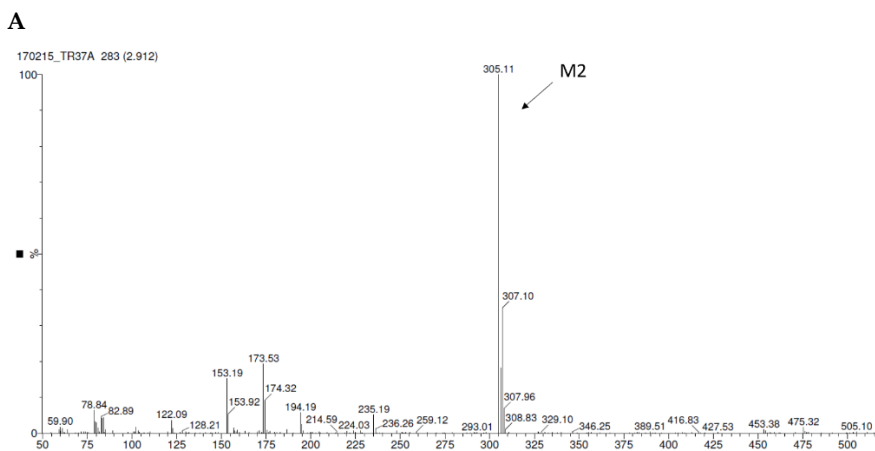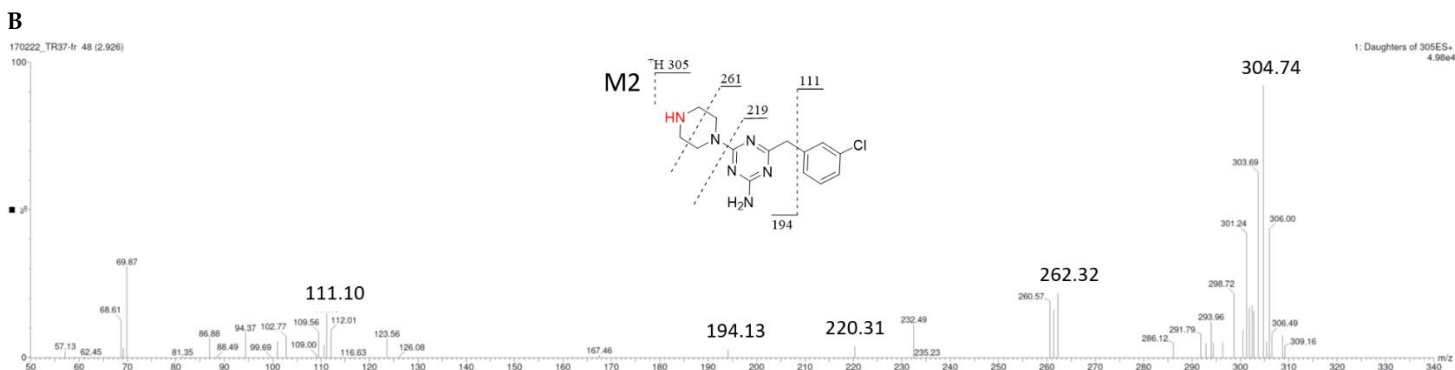

Figure S3. MS spectrum of compound's 1 metabolite M2 (A) and its MS ion fragment analysis (B).

## 2. MS spectra and MS ion fragment analyses of compound 2 and its metabolites.

**A**

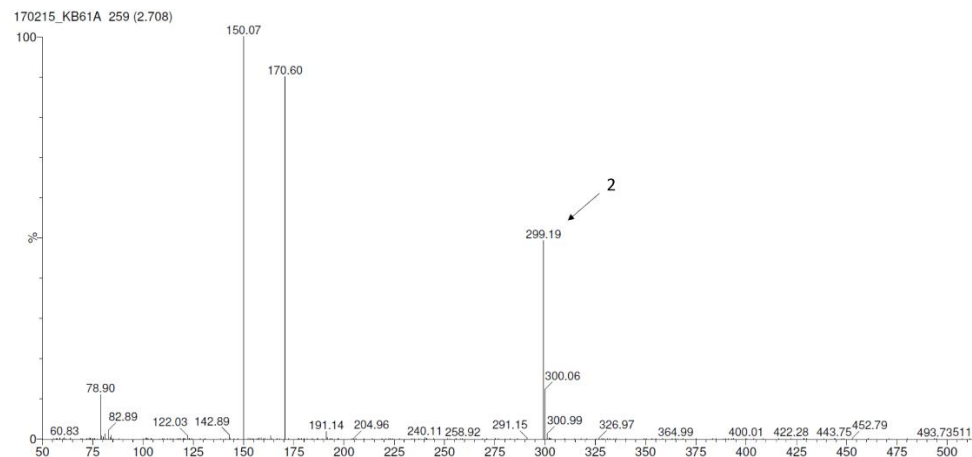

**B**

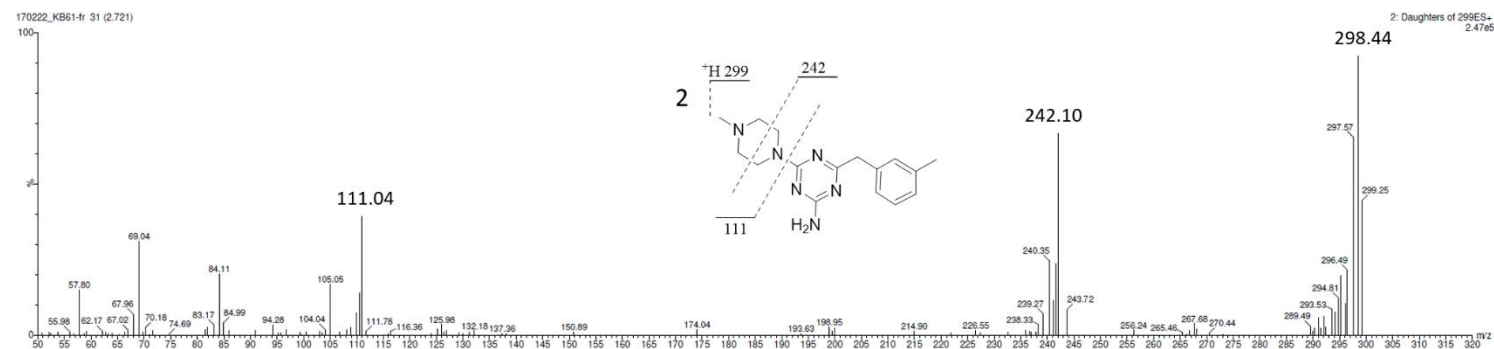

Figure S4. MS spectrum of compound 2 (A) and its MS ion fragment analysis (B).

**A**

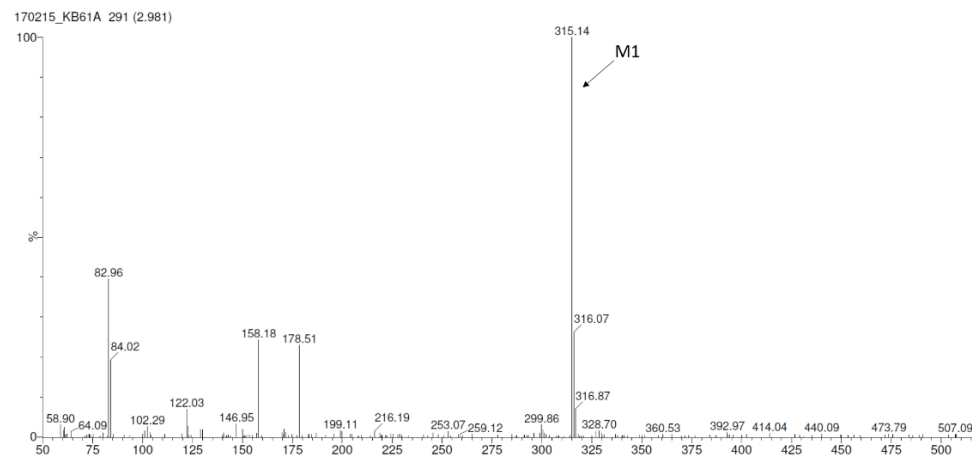

**B**

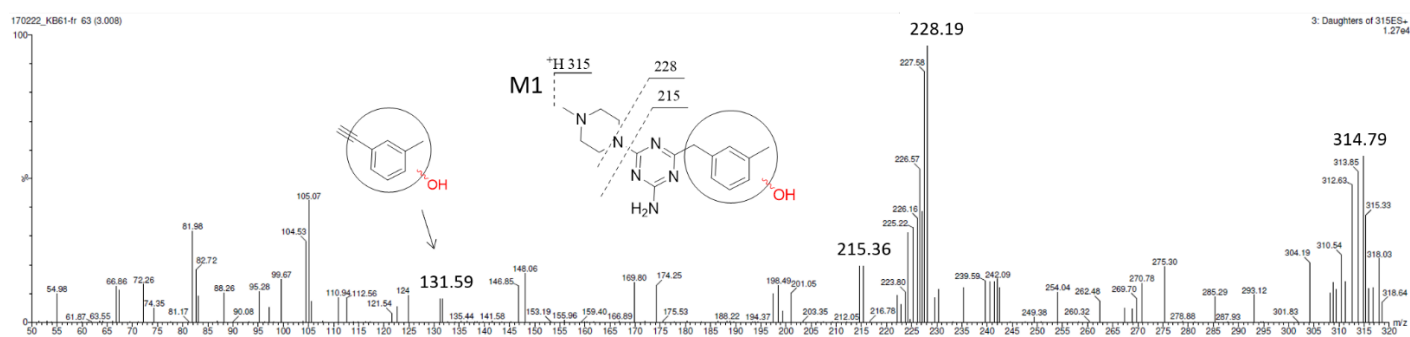

Figure S5. MS spectrum of compound's 2 metabolite M1 (A) and its MS ion fragment analysis (B).

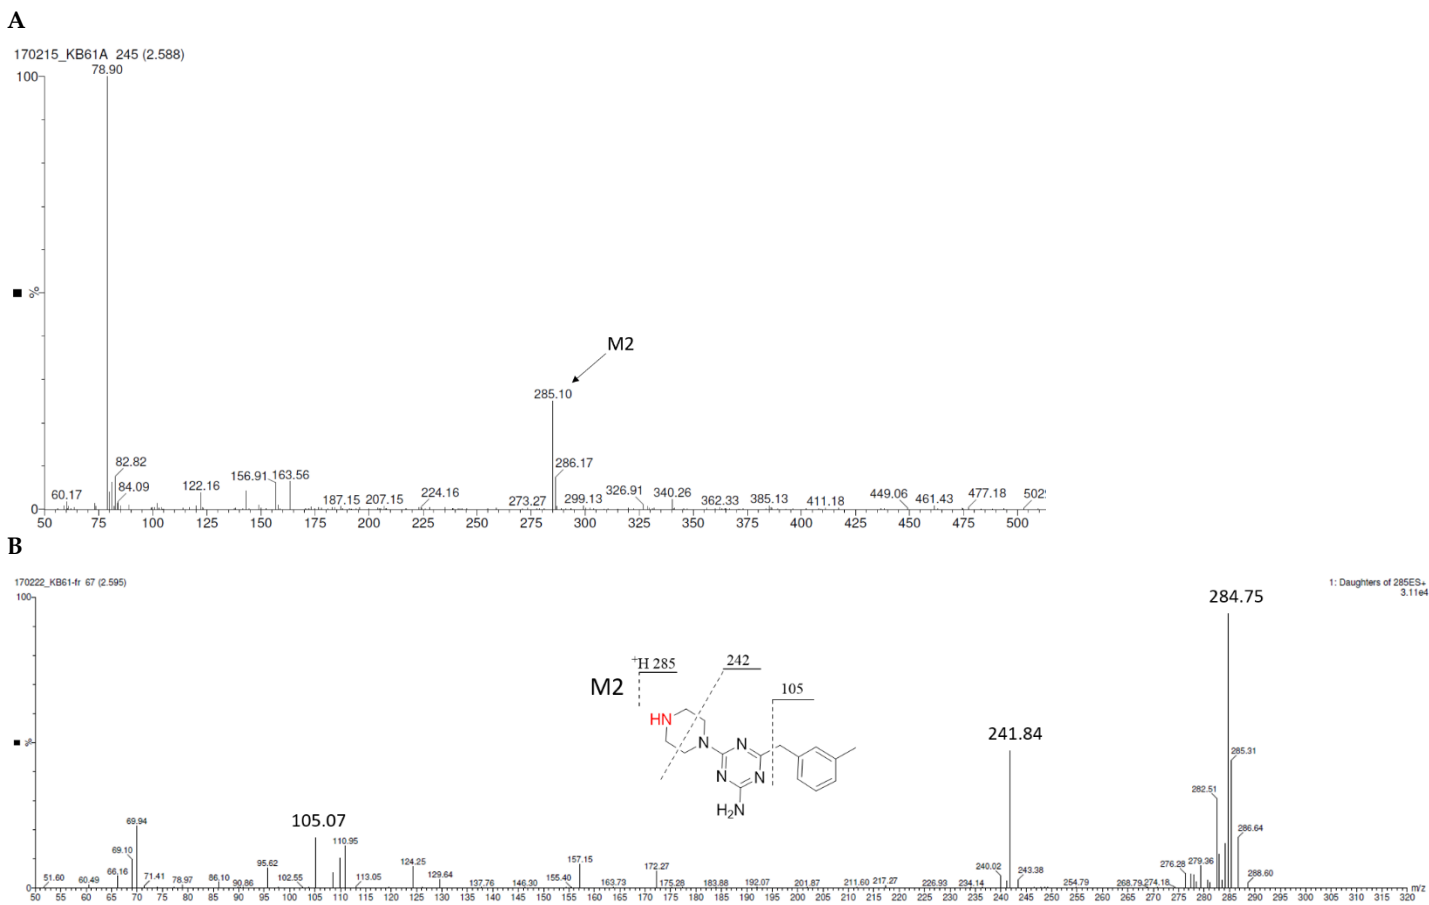

Figure S6. MS spectrum of compound 2 metabolite M2 (A) and its MS ion fragment analysis (B)

### 3. MS spectra and MS ion fragment analyses of compound 3 and its metabolites.

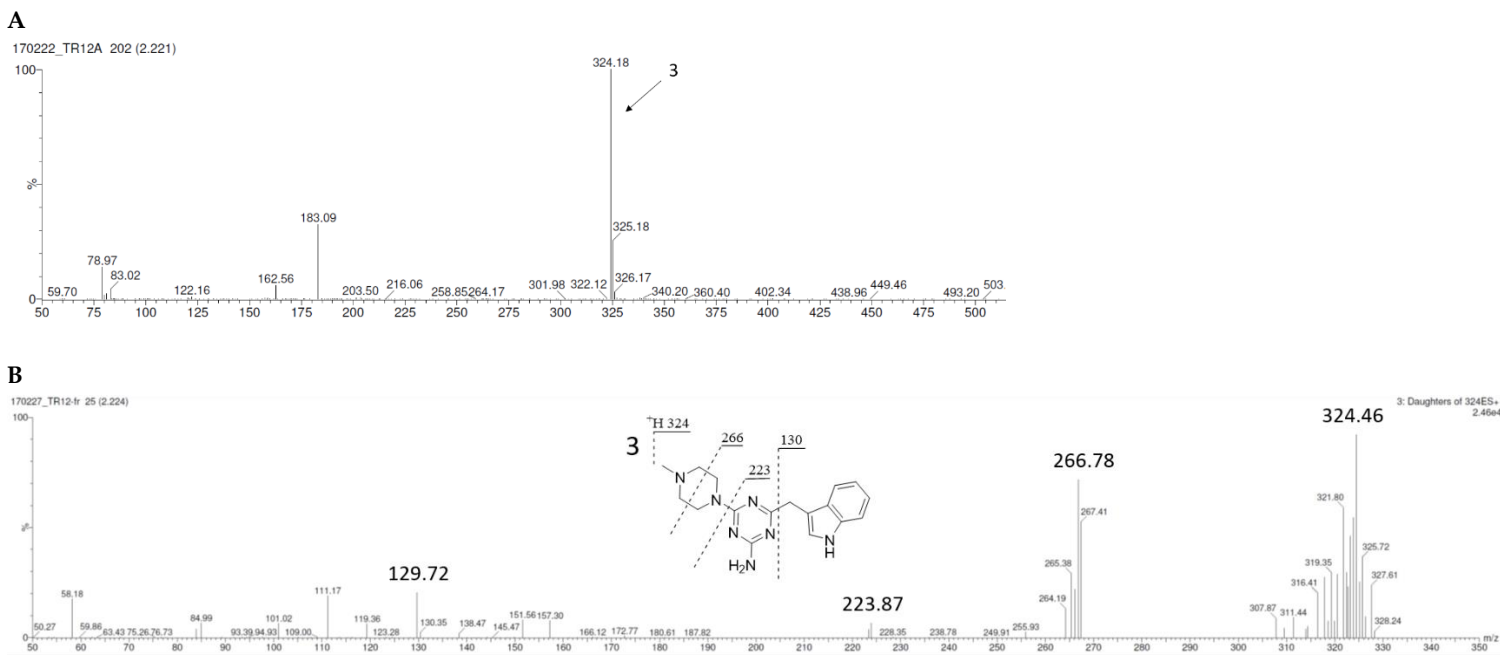

Figure S7. MS spectrum of compound 3 (A) and its MS ion fragment analysis (B).

**A**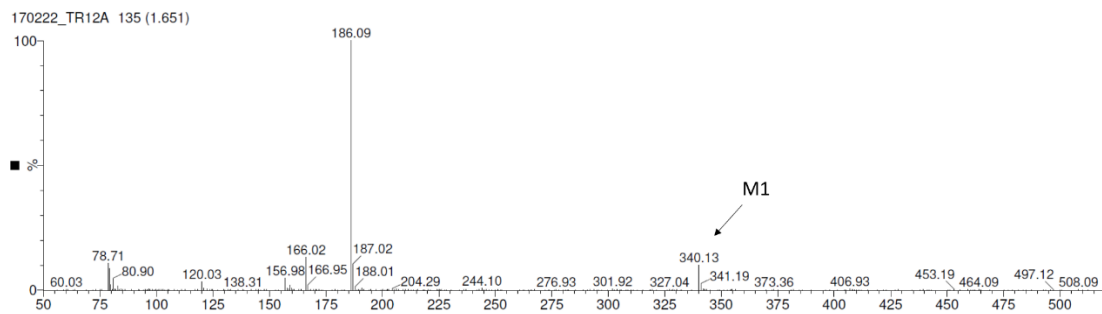**B**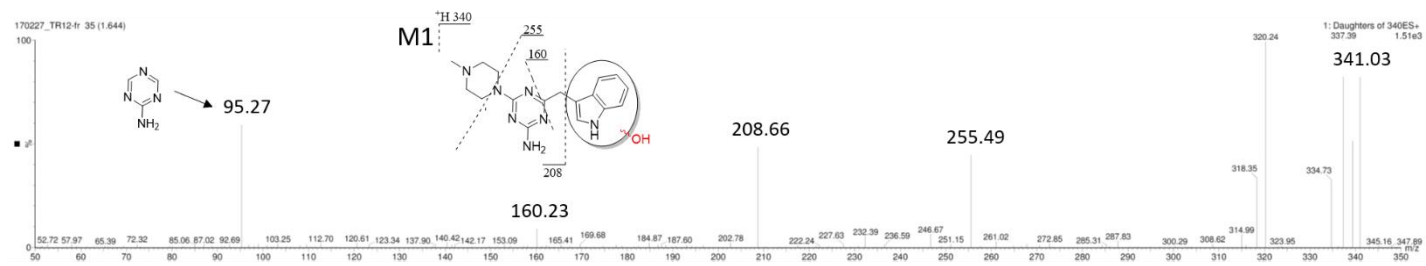

Figure S8. MS spectrum of compound's 3 metabolite M1 (A) and its MS ion fragment analysis (B).

**A**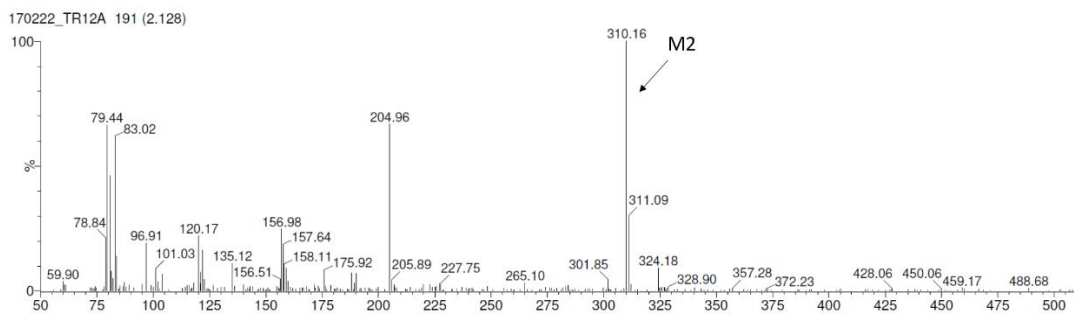**B**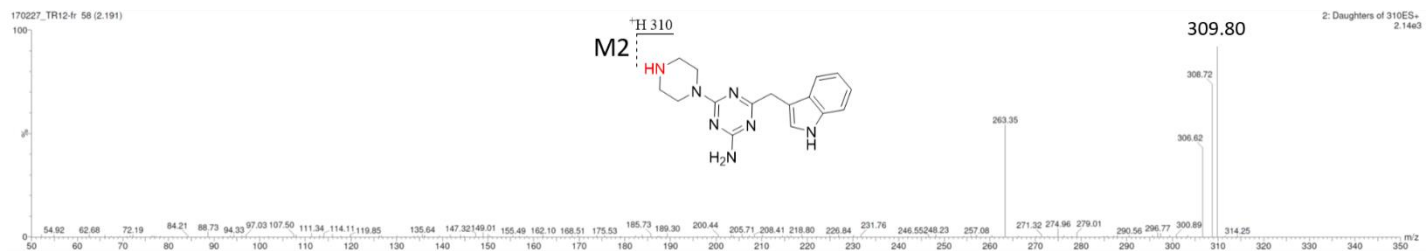

Figure S9 MS spectrum of compound's 3 metabolite M2 (A) and its MS ion fragment analysis (B).

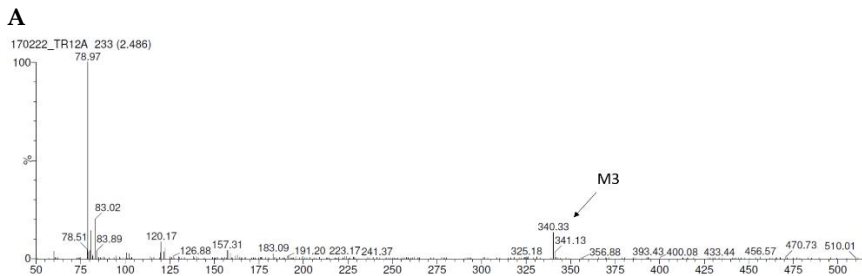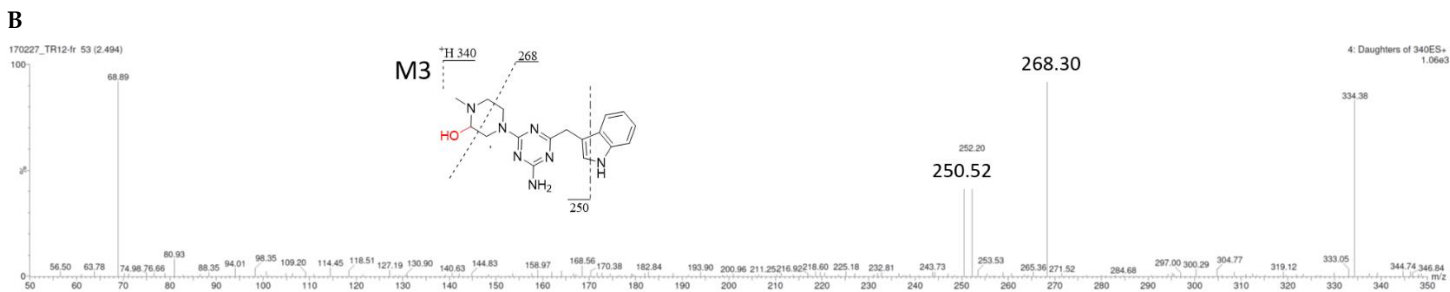

Figure S10 MS spectrum of compound's 3 metabolite M3 (A) and its MS ion fragment analysis (B).

#### 4. MS spectra and MS ion fragment analyses of compound 4 and its metabolites.

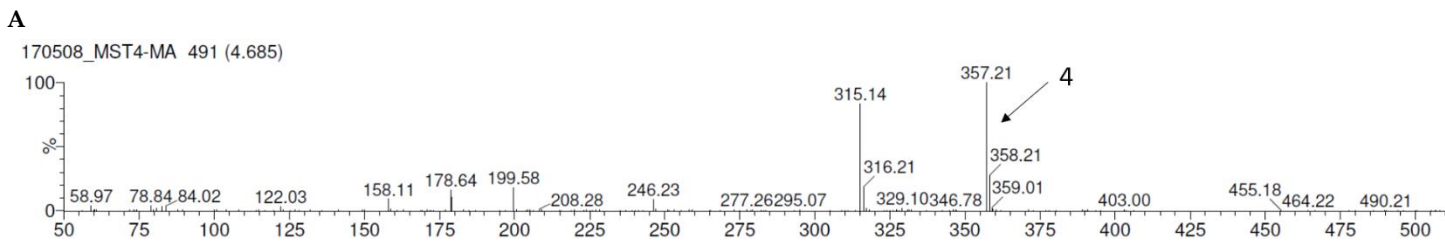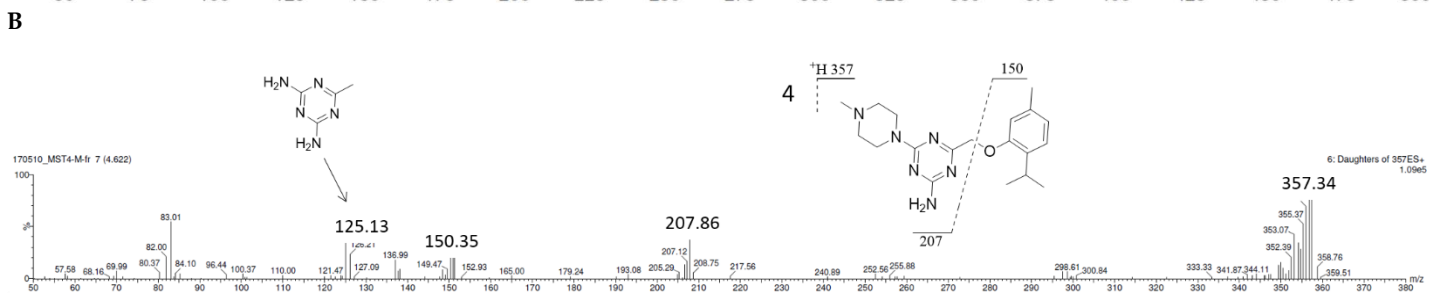

Figure S11. MS spectrum of compound 4 (A) and its MS ion fragment analysis (B).

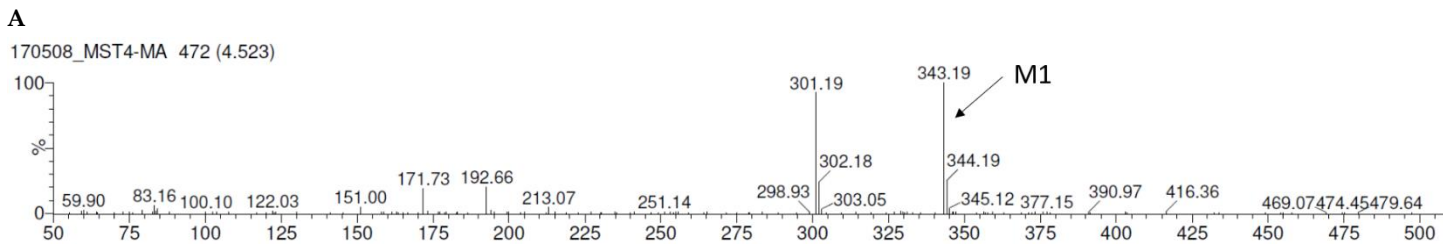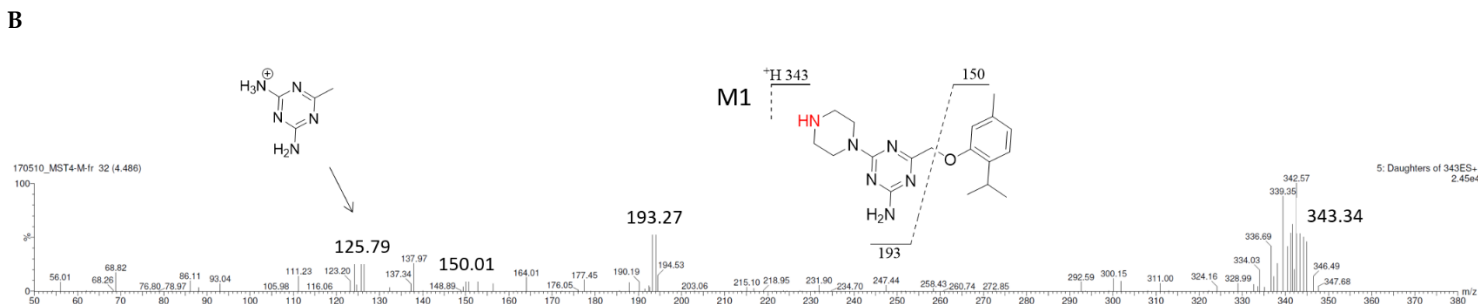

Figure S12 MS spectrum of compound's 4 metabolite M1 (A) and its MS ion fragment analysis (B).

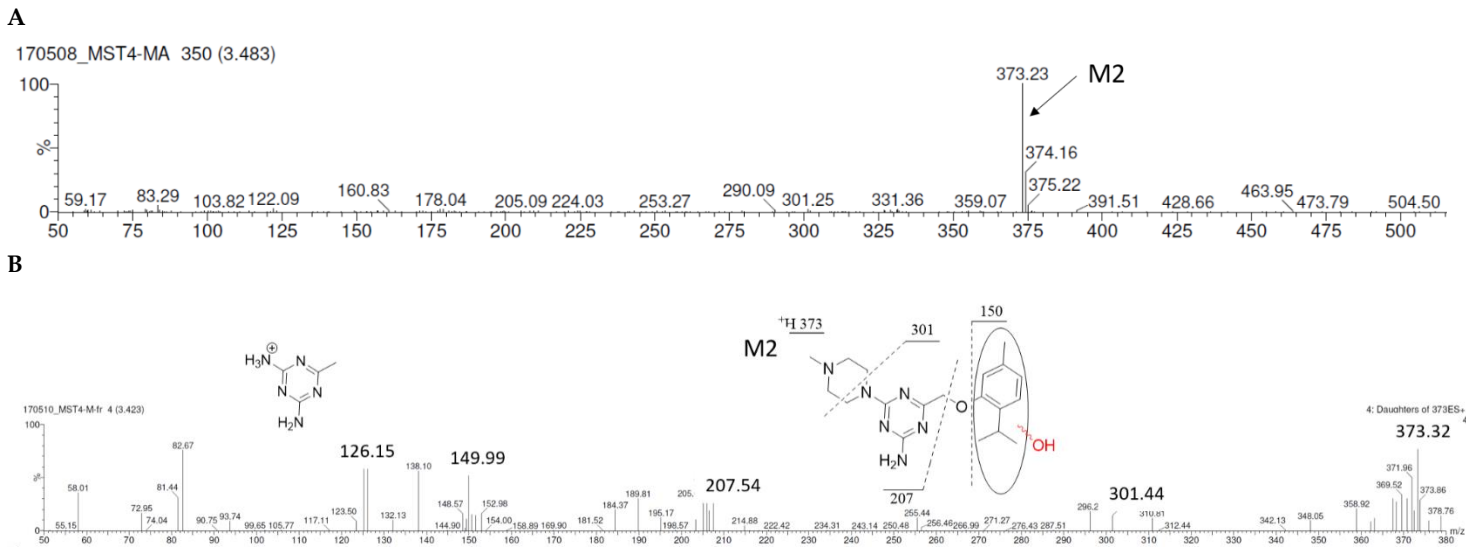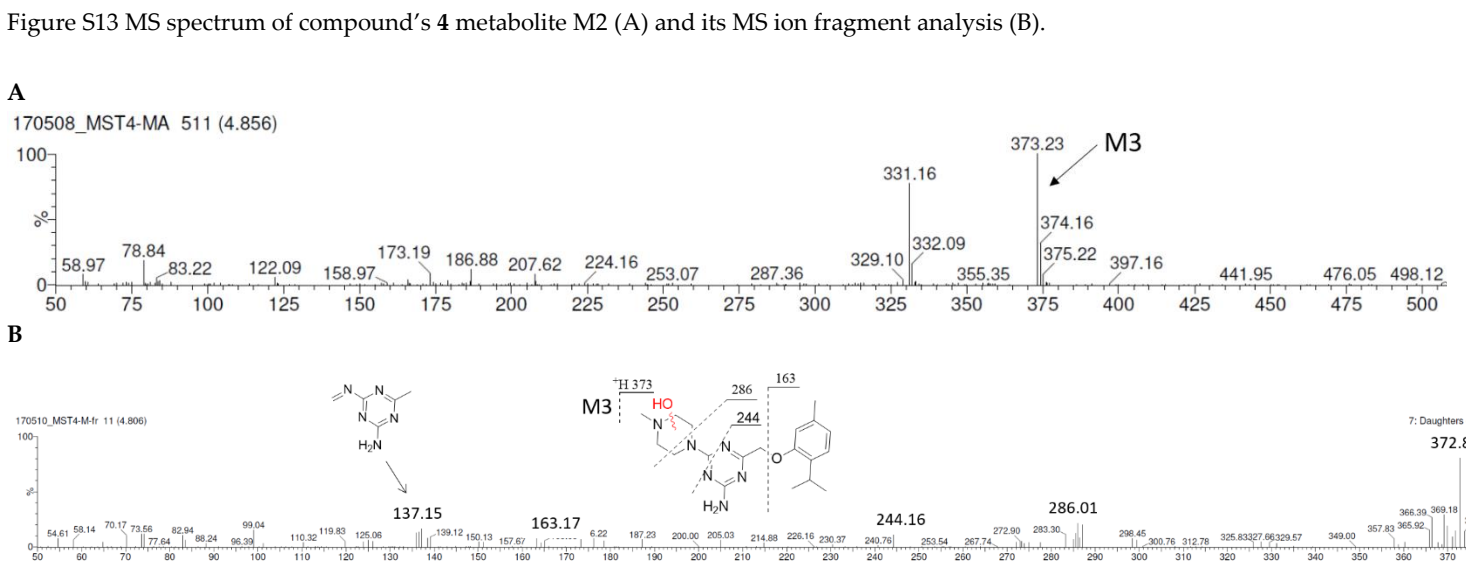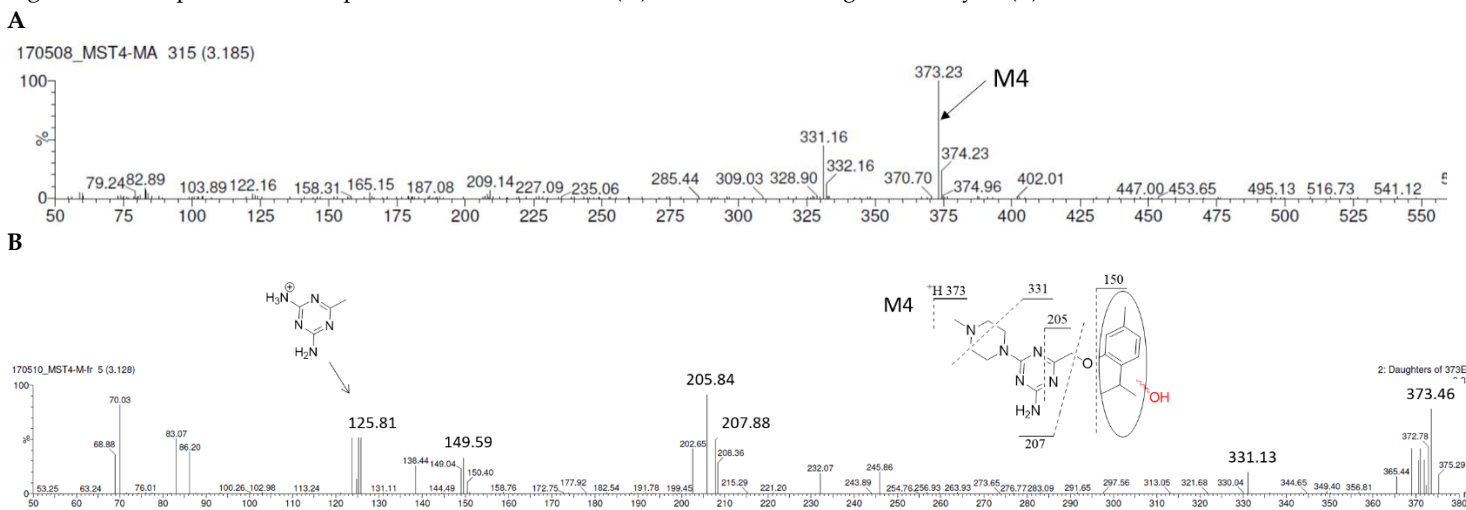

\_WERAPAMIL-HMA

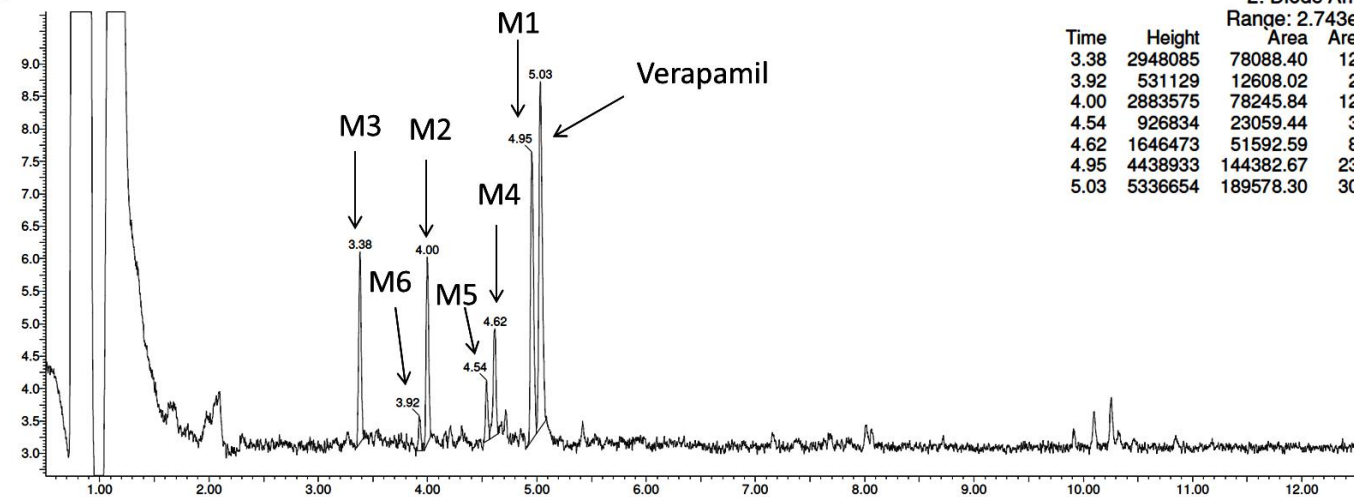

2: Diode Array  
Range: 2.743e+2

| Time | Height  | Area      | Area% |
|------|---------|-----------|-------|
| 3.38 | 2948085 | 78088.40  | 12.70 |
| 3.92 | 531129  | 12608.02  | 2.05  |
| 4.00 | 2883575 | 78245.84  | 12.73 |
| 4.54 | 926834  | 23059.44  | 3.75  |
| 4.62 | 1646473 | 51592.59  | 8.39  |
| 4.95 | 4438933 | 144382.67 | 23.49 |
| 5.03 | 5336654 | 189578.30 | 30.84 |

Figure S16 UPLC spectra of the reaction mixture after 120 min incubation of reference drug verapamil with HLMs.
